# Supplementary material for: Measurement of total antioxidant capacity in sub-μL blood samples using craft paper-based analytical devices
Source: Royal Society of Chemistry journal article supplement (doi:10.1039/c5ra06479a), 2015-01-01
Supplement: c5ra06479a1.pdf [file c5ra06479a1.pdf]

## Supplementary Information

### **Measurement of Total Antioxidant Capacity in Sub- $\mu$ L Blood Samples Using Craft Paper-based Analytical Devices**

Meng Sun and Michael A. Johnson\*

Department of Chemistry and R. N. Adams Institute for Bioanalytical Chemistry, University of Kansas,  
Lawrence, Kansas 66045, United States

\* Email: johnsonm@ku.edu

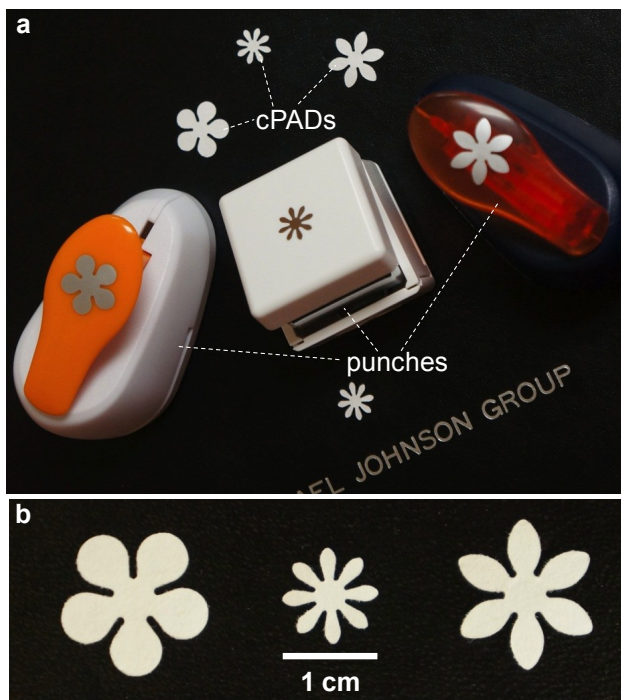

**Figure S1.** (a) Craft Paper-based Analytical Devices (cPADs) made by hand craft punches with various designs. Each punch costs less than \$5. (b) A close-view of the cPADs.

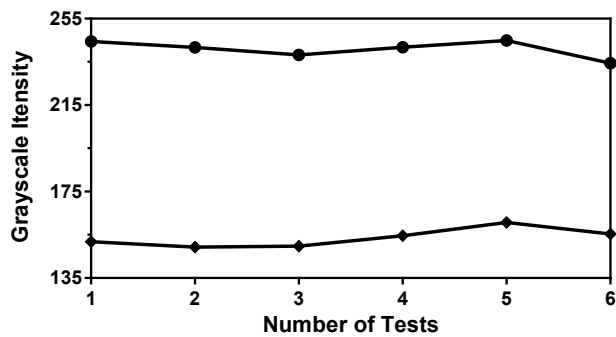

**Figure S2.** Six measurements in a row over a period of 1.5 h. ● 0.2 M uric acid standard; ◆ plasma sample collected from a C57BL/6 male mouse.

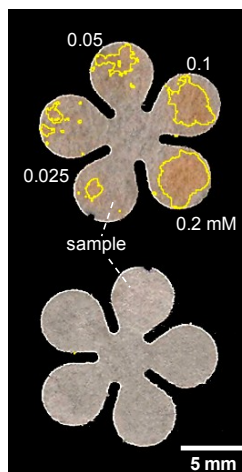

**Figure S3.** Control experiment for isolated plasma samples in TAC testing. Upper assay: coated with reaction buffer; lower control: coated with PBS. 0.5- $\mu$ L plasma obtained from C57BL/6 mouse spotted to the assay and control cPADs. The control cPAD shows no development of color and no color recognized by the software.
